# Supplementary material for: The investigation of an organic acid assisted sol–gel method for preparing monolithic zirconia aerogels
Source: RSC Adv. 2018 Feb 22;8(15):8011–20. doi: 10.1039/c7ra13041d (PMC9078517; doi:10.1039/c7ra13041d)
Supplement: RA-008-C7RA13041D-s001 [file RA-008-C7RA13041D-s001.pdf]

## The investigation of organic acids assisted sol-gel method for preparing monolithic zirconia aerogels

Xiaoqing Wang<sup>a</sup>, Chengyuan Li<sup>a</sup>, Zhenyu Shi<sup>a</sup>, Mingjia Zhi<sup>a\*</sup> and Zhanglian Hong<sup>a\*</sup>

State Key Laboratory of Silicon Materials, School of Materials Science and Engineering,  
Zhejiang University, Hangzhou 310027, China.

\* Corresponding author: mingjia\_zhi@zju.edu.cn; hong\_zhanglian@zju.edu.cn.

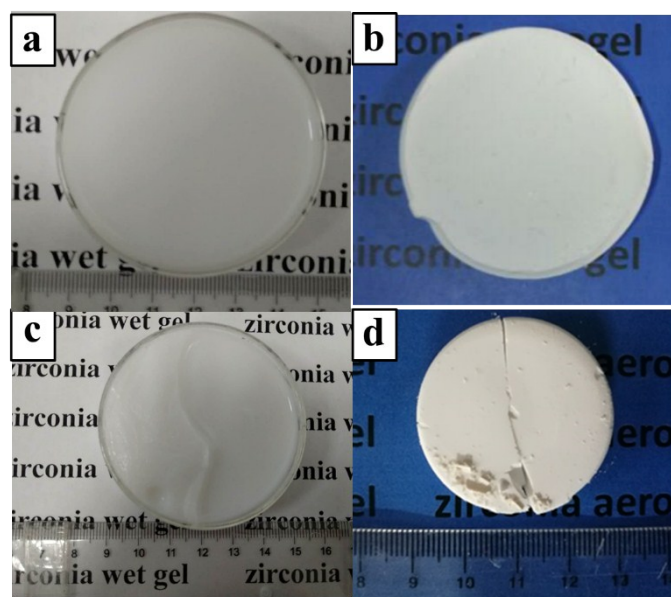

**Figure S1** Photos for the wet gel and the aerogel after supercritical drying, (a) LAA-4-wet gel, (b) LAA-4-aerogel, (c) LMA-6-wet gel and (d) LMA-6-aerogel.

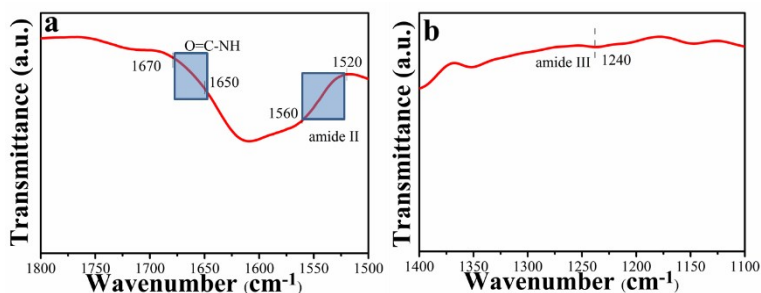

**Figure S2** Enlarged FT-IR spectra of LAA-4-xerogel from 1800-1500  $\text{cm}^{-1}$  and 1400-1100  $\text{cm}^{-1}$ , and the possible peak positions for O=C-NH, amide II and amide III vibration bands are marked.

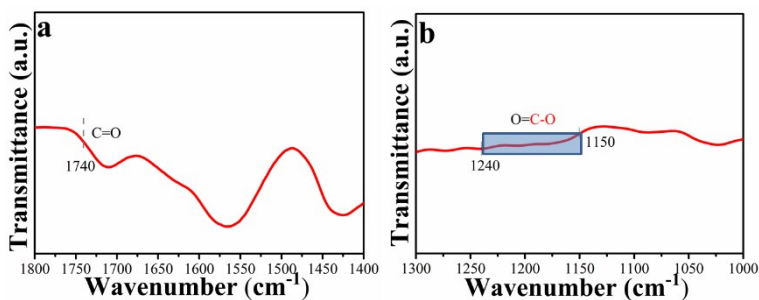

**Figure S3** Enlarged FT-IR spectra of MSA-8-aerogel from 1800-1400  $\text{cm}^{-1}$  and 1300-1000  $\text{cm}^{-1}$ , and the possible peak positions for O=C-O are marked.

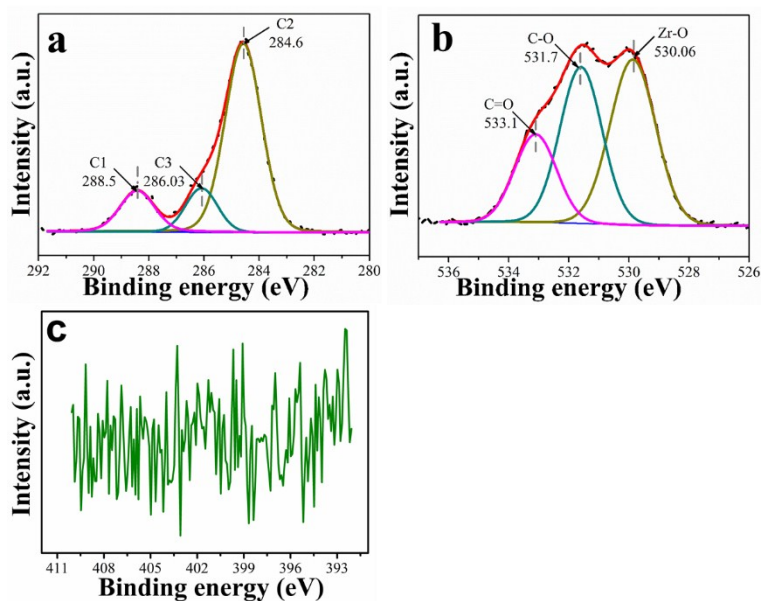

**Figure S4** XPS spectra of LAA-4-aerogel, (a) C 1s, (b) O 1s and (c) N 1s.

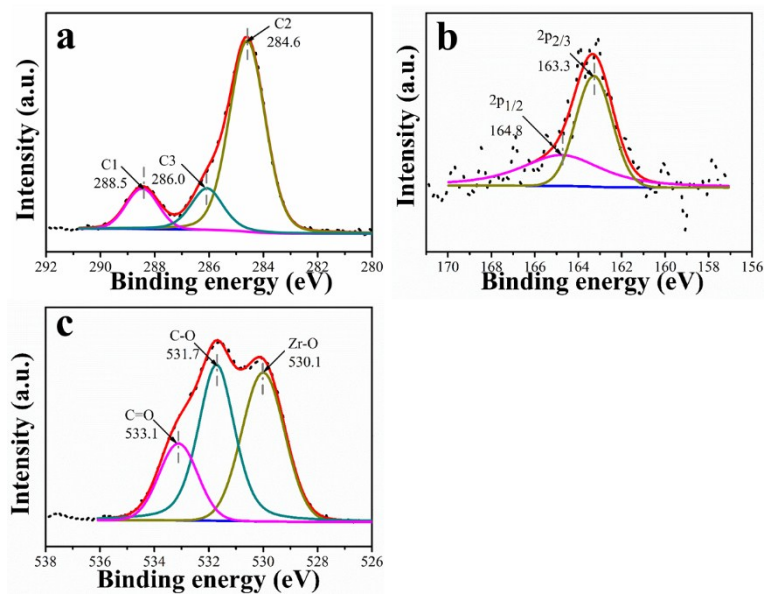

**Figure S5** XPS spectra of MSA-8-aerogel, (a) C 1s, (b) S 1s and (c) O 1s.

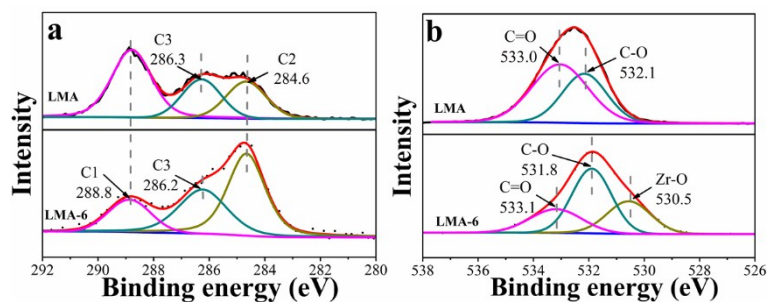

**Figure S6** XPS spectra of inorganic acid LMA and LMA-6-xerogel, (a) C 1s and (b) O 1s.

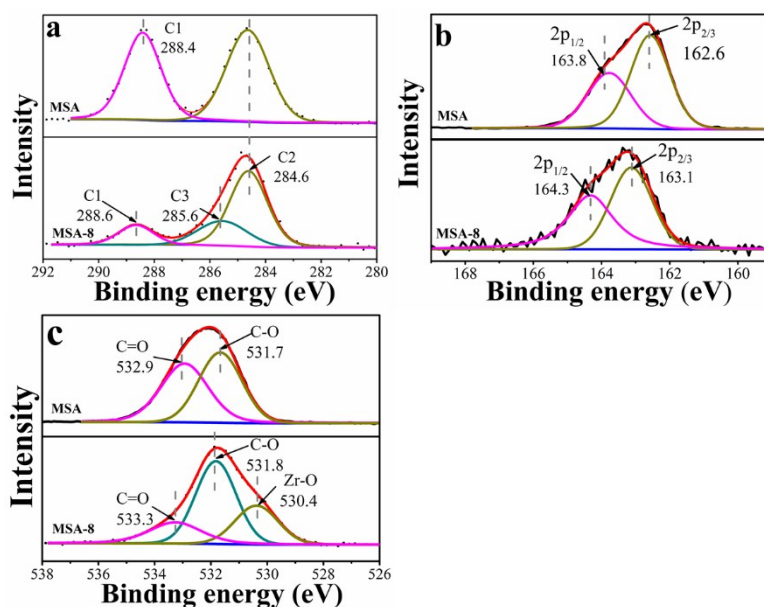

**Figure S7** XPS spectra of organic acid MSA and MSA-8-xerogel, (a) C 1s, (b) S 2p and (c) O 1s.

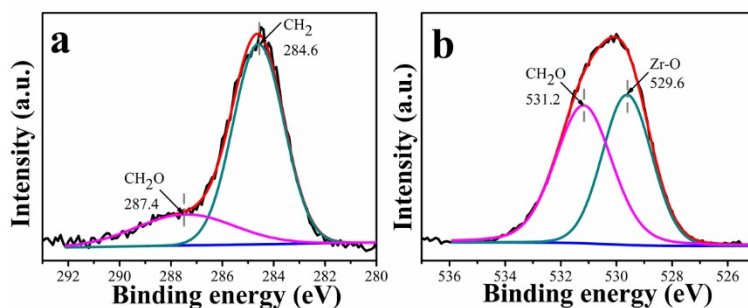

**Figure S8** XPS spectra of (a) C 1s and (b) O 1s in PO-8-aerogel.

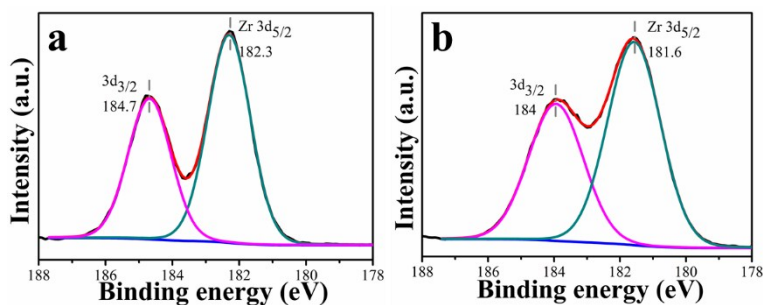

**Figure S9** XPS spectra of Zr 3d in LAA-4-aerogel and (b) PO-8-aerogel.

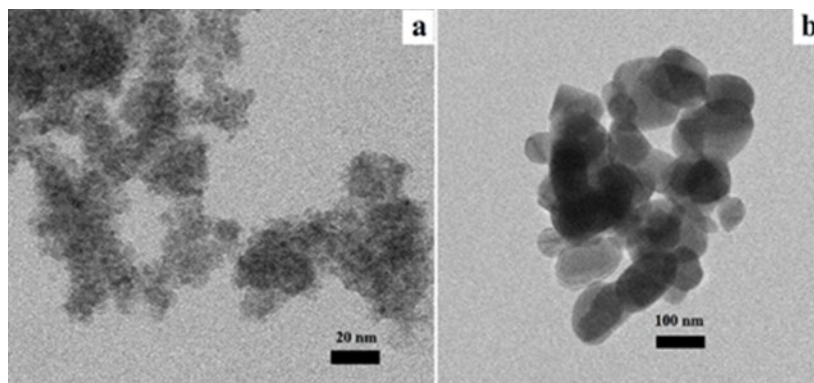

**Figure S10** TEM images of MSA-8 aerogel (a) as-prepared and (b) after heat treatment at 1000 °C.

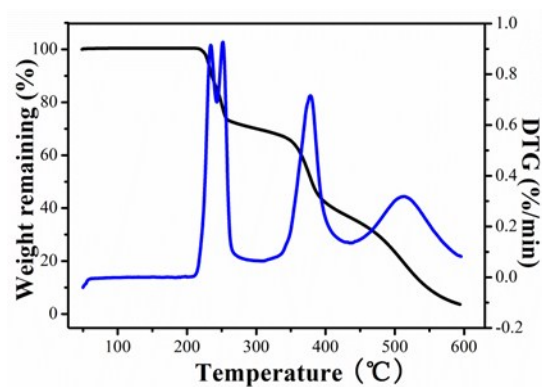

**Figure S11** Temperature-dependent weight remaining and the corresponding derivatives of organic acid LAA.
